# Supplementary material for: A new wipe-sampling instrument for measuring the collection efficiency of trace explosives residues
Source: Royal Society of Chemistry journal article supplement (doi:10.1039/c7ay02694c), 2017-12-04
Supplement: c7ay02694c1.pdf [file c7ay02694c1.pdf]

# Supporting Information for: A New Wipe-Sampling Instrument for Measuring the Collection Efficiency of Trace Explosives Residues

Elizabeth L. Robinson<sup>a\*</sup>, Edward Sisco<sup>a</sup>, Matthew E. Staymates<sup>a</sup>, and Jeffrey A. Lawrence<sup>a</sup>

<sup>a</sup>National Institute of Standards and Technology, Materials Measurement Science Division, Gaithersburg, MD, USA

\* Correspondence: [elizabeth.robinson@nist.gov](mailto:elizabeth.robinson@nist.gov)

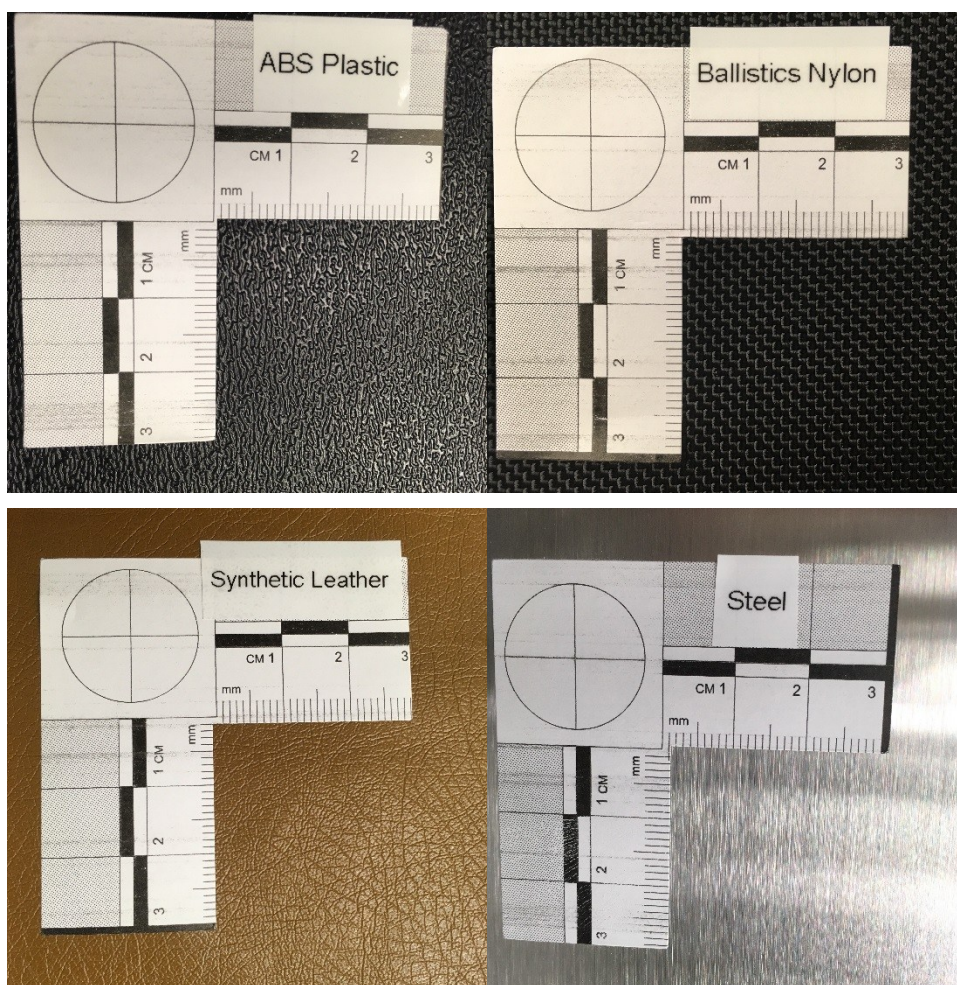

**Figure S1.** Images of ABS plastic with industry standard textured hair-cell finish, ballistics nylon, synthetic leather, and steel test surfaces.

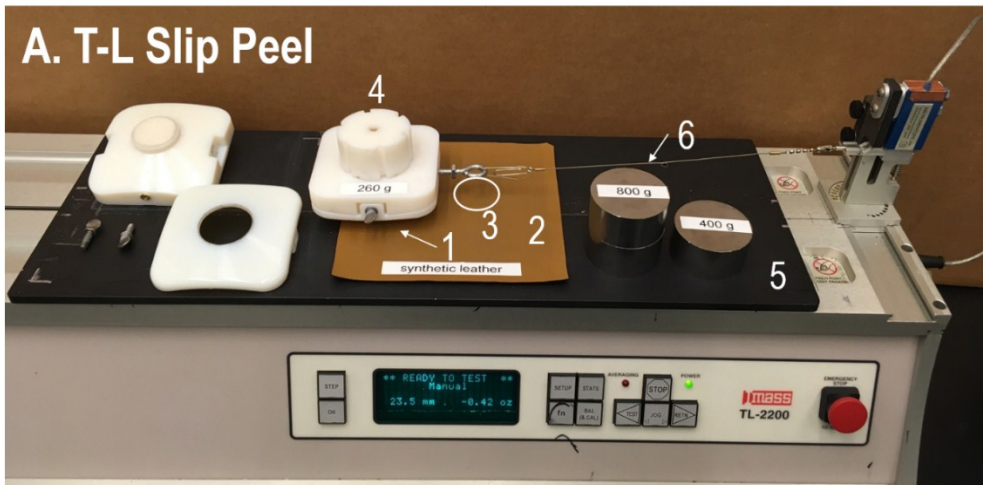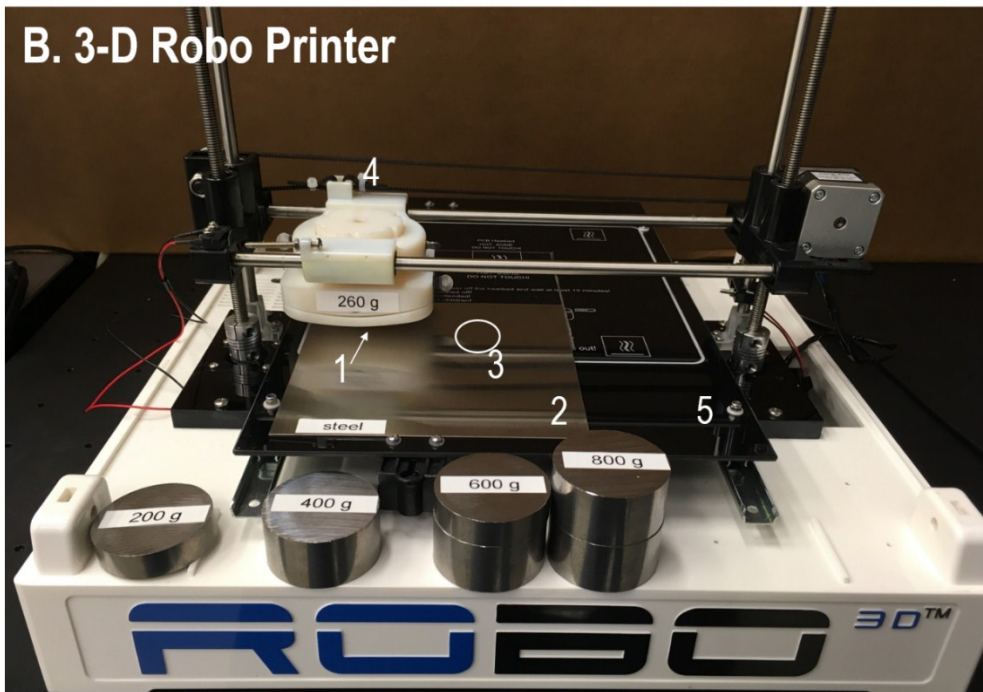

- 1. Wipe
- 2. Test surface
- 3. Test particles
- 4. Wipe holder
- 5. Platform
- 6. Restraining line

**Figure S2.** Wipe-sampling instruments: Image of the TL-slip/peel tester (A.) with wipe mount and synthetic leather test surface. Image of the Robo3D (B.) with wipe mount and steel test surface.

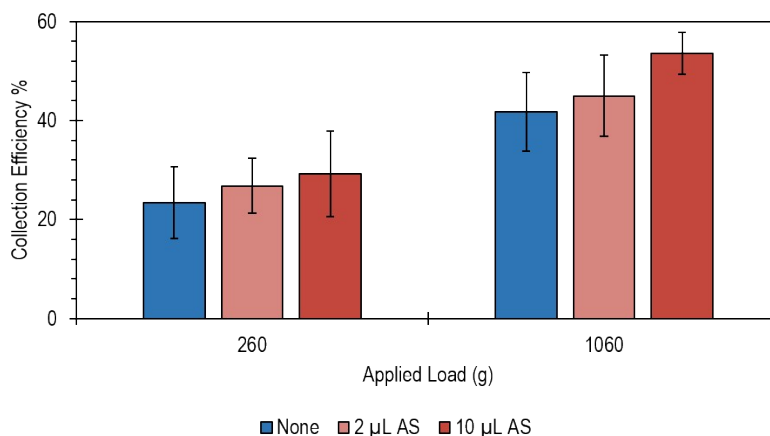

**Figure S3.** Comparison of collection efficiencies of RDX using Nomex® wipes and the Robo3D wipe-sampler for ABS plastic test surface conditions: artificial sebum not added (None), addition of 2  $\mu$ L of artificial sebum (2  $\mu$ L AS), addition of 10  $\mu$ L of artificial sebum (10  $\mu$ L AS). Uncertainties represent one standard deviation of the mean.

---

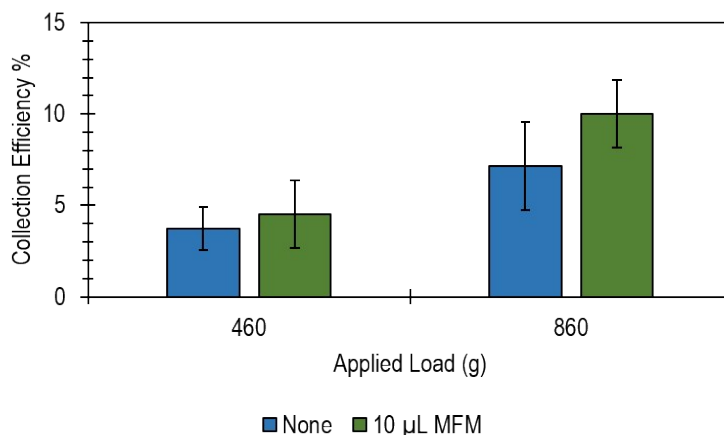

**Figure S4.** Comparison of collection efficiencies of RDX using Teflon wipes and the Robo3D wipe-sampler for ABS plastic test surface conditions: modified fingerprint mixture not added (None), addition of 10  $\mu$ L of modified fingerprint mixture (10  $\mu$ L MFM). Uncertainties represent one standard deviation of the mean.

---
